# Supplementary material for: Colistin Dosing Regimens against Pseudomonas aeruginosa in Critically Ill Patients: An Application of Monte Carlo Simulation
Source: MDPI journal article supplement (doi:10.3390/antibiotics10050595), 2021-05-17
Supplement: s1 [file s1]

# Supplementary material

The Probability of target attainment (PTA) of different regimens at each minimum inhibitory concentration (MIC) level

**Table S1.** PTA of different regimens in CrCl range of 1-10 mL/min.

| <b>MIC (mg/L)<br/>Regimens</b>                             | <b>0.25</b> | <b>0.5</b> | <b>1</b> | <b>2</b> | <b>4</b> | <b>8</b> | <b>16</b> | <b>32</b> | <b>64</b> |
|------------------------------------------------------------|-------------|------------|----------|----------|----------|----------|-----------|-----------|-----------|
| <b>LD 300 mg MD 60 mg<br/>q12h (120 mg) (EMA)</b>          | 100         | 99.96      | 99.49    | 95.24    | 75.36    | 38.35    | 9.88      | 0.77      | 0.04      |
| <b>LD 300 mg MD 70 mg<br/>q12h (140 mg) (Na-<br/>tion)</b> | 100         | 99.97      | 99.43    | 95       | 76       | 39.07    | 9.83      | 1.03      | 0.02      |
| <b>LD 300 mg MD 80 mg<br/>q24h (80 mg) (our<br/>study)</b> | 99.99       | 99.85      | 97.78    | 84.16    | 50.14    | 14.9     | 2.06      | 0.07      | 0         |
| <b>LD 300 mg MD 33 mg<br/>q24h (33 mg) (our<br/>study)</b> | 99.61       | 95.6       | 76.45    | 40.12    | 11.14    | 1.71     | 0.07      | 0         | 0         |
| <b>LD 300 mg MD 40 mg<br/>q12h (80 mg) (our<br/>study)</b> | 100         | 99.77      | 97.92    | 85.99    | 54.49    | 19.54    | 3.04      | 0.17      | 0         |
| <b>LD 300 mg MD 66 mg<br/>q24h (66 mg) (our<br/>study)</b> | 100         | 99.6       | 95.6     | 76.33    | 39.72    | 10.52    | 1.12      | 0.06      | 0         |

PTA: Probability of target attainment. CrCl: creatinine clearance. MIC: minimum inhibitory concentration. LD: loading dose (in mg of colistin base activity). MD: maintenance dose (in mg of colistin base activity). q12h: every 12 hours. EMA: European Medicines Agency. US-FDA: Food and Drug Administration of United State.

**Table S2.** PTA of different regimens in CrCl range of 11-29 mL/min.

| <b>MIC (mg/L)<br/>Regimens</b>                               | <b>0.25</b> | <b>0.5</b> | <b>1</b> | <b>2</b> | <b>4</b> | <b>8</b> | <b>16</b> | <b>32</b> | <b>64</b> |
|--------------------------------------------------------------|-------------|------------|----------|----------|----------|----------|-----------|-----------|-----------|
| <b>LD 300 mg MD 80 mg<br/>q12h (160 mg) (Na-<br/>tion)</b>   | 99.95       | 99.71      | 98.45    | 90.59    | 65.99    | 29.9     | 5.83      | 0.4       | 0.01      |
| <b>LD 300 mg MD 90 mg<br/>q12h (180 mg) (EMA)</b>            | 99.98       | 99.77      | 98.98    | 92.21    | 71.15    | 35.44    | 8.04      | 0.59      | 0.03      |
| <b>LD 300 mg MD 90 mg<br/>q36h (60 mg) (US-<br/>FDA)</b>     | 99.67       | 97.01      | 78.55    | 39.17    | 9.83     | 0.8      | 0.02      | 0         | 0         |
| <b>LD 300 mg MD 100<br/>mg q24h (100 mg)<br/>(our study)</b> | 99.86       | 98.98      | 93.85    | 74.37    | 37.3     | 8.72     | 0.7       | 0         | 0         |
| <b>LD 300 mg MD 200<br/>mg q36h (133 mg)<br/>(our study)</b> | 99.95       | 99.78      | 97.84    | 83.31    | 44.13    | 12.2     | 1.18      | 0.04      | 0         |
| <b>LD 300 mg MD 120<br/>mg q24h (120 mg)<br/>(our study)</b> | 99.94       | 99.39      | 96       | 81.28    | 46.78    | 13.97    | 1.63      | 0.07      | 0         |

|                                                                                                                                                                                                                                                                                                                                   |       |       |       |       |       |       |      |      |   |
|-----------------------------------------------------------------------------------------------------------------------------------------------------------------------------------------------------------------------------------------------------------------------------------------------------------------------------------|-------|-------|-------|-------|-------|-------|------|------|---|
| <b>LD 300 mg MD 66 mg<br/>q24h (66 mg) (our<br/>study)</b>                                                                                                                                                                                                                                                                        | 99.62 | 97.33 | 84.64 | 52.72 | 17.86 | 2.55  | 0.16 | 0    | 0 |
| <b>LD 300 mg MD 60 mg<br/>q12h (120 mg) (our<br/>study)</b>                                                                                                                                                                                                                                                                       | 99.93 | 99.54 | 96.44 | 82.8  | 51.08 | 17.86 | 2.55 | 0.1  | 0 |
| <b>LD 300 mg MD 150<br/>mg q24h (150 mg)<br/>(our study)</b>                                                                                                                                                                                                                                                                      | 99.96 | 99.76 | 97.9  | 88.35 | 59.5  | 22.19 | 3.6  | 0.11 | 0 |
| PTA: Probability of target attainment. CrCl: creatinine clearance. MIC: minimum inhibitory concentration. LD: loading dose (in mg of colistin base activity). MD: maintenance dose (in mg of colistin base activity). q12h: every 12 hours. EMA: European Medicines Agency. US-FDA: Food and Drug Administration of United State. |       |       |       |       |       |       |      |      |   |

**Table S3.** PTA of different regimens in CrCl range of 30- 50 mL/min.

| <b>MIC (mg/L)<br/>Regimens</b>                                                                                                                                                                                                                                                                                                    | <b>0.25</b> | <b>0.5</b> | <b>1</b> | <b>2</b> | <b>4</b> | <b>8</b> | <b>16</b> | <b>32</b> | <b>64</b> |
|-----------------------------------------------------------------------------------------------------------------------------------------------------------------------------------------------------------------------------------------------------------------------------------------------------------------------------------|-------------|------------|----------|----------|----------|----------|-----------|-----------|-----------|
| <b>LD 300 mg MD 80 mg<br/>q8h (240 mg) (our<br/>study)</b>                                                                                                                                                                                                                                                                        | 99.74       | 98.95      | 96.16    | 86.15    | 62.54    | 29.01    | 6.85      | 0.61      | 0.01      |
| <b>LD 300 mg MD 250<br/>mg q24h (250 mg)<br/>(our study)</b>                                                                                                                                                                                                                                                                      | 99.76       | 99.18      | 96.61    | 85.6     | 58.65    | 24.96    | 4.6       | 0.29      | 0.02      |
| <b>LD 300 ng MD 125 mg<br/>q12h (250 mg) (EMA)</b>                                                                                                                                                                                                                                                                                | 99.88       | 99.18      | 96.53    | 86.35    | 61.72    | 28.25    | 6.13      | 0.42      | 0.01      |
| <b>LD 300 mg MD 110<br/>mg q12h (220 mg)<br/>(Nation)</b>                                                                                                                                                                                                                                                                         | 99.67       | 98.71      | 94.9     | 83.11    | 55.45    | 22.83    | 4.21      | 0.3       | 0         |
| <b>LD 300 mg MD 75 mg<br/>q12h (150 mg) (US-<br/>FDA)</b>                                                                                                                                                                                                                                                                         | 99.31       | 97.66      | 90.39    | 69.6     | 37.45    | 10.77    | 1.21      | 0.02      | 0         |
| <b>LD 300 mg MD 120<br/>mg q12h (240 mg)<br/>(our study)</b>                                                                                                                                                                                                                                                                      | 99.78       | 99.07      | 95.76    | 84.77    | 60.79    | 25.92    | 5.61      | 0.48      | 0.01      |
| <b>LD 300 mg MD 100<br/>mg q24h (100 mg)<br/>(our study)</b>                                                                                                                                                                                                                                                                      | 98.4        | 93.77      | 78.9     | 47.3     | 15.83    | 2.14     | 0.15      | 0         | 0         |
| <b>LD 300 mg MD 100<br/>mg q12h (200 mg)<br/>(our study)</b>                                                                                                                                                                                                                                                                      | 99.64       | 98.48      | 94.35    | 79.97    | 50.36    | 18.28    | 3.25      | 0.19      | 0         |
| <b>LD 300 mg MD 200<br/>mg q24h (200 mg)<br/>(our study)</b>                                                                                                                                                                                                                                                                      | 99.7        | 98.62      | 94.08    | 79.26    | 48.41    | 16.08    | 1.96      | 0.11      | 0         |
| PTA: Probability of target attainment. CrCl: creatinine clearance. MIC: minimum inhibitory concentration. LD: loading dose (in mg of colistin base activity). MD: maintenance dose (in mg of colistin base activity). q12h: every 12 hours. EMA: European Medicines Agency. US-FDA: Food and Drug Administration of United State. |             |            |          |          |          |          |           |           |           |

**Table S4.** PTA of different regimens in CrCl range of 51- 79 mL/min.

| <b>MIC (mg/L)<br/>Regimens</b>                                 | <b>0.25</b> | <b>0.5</b> | <b>1</b> | <b>2</b> | <b>4</b> | <b>8</b> | <b>16</b> | <b>32</b> | <b>64</b> |
|----------------------------------------------------------------|-------------|------------|----------|----------|----------|----------|-----------|-----------|-----------|
| <b>LD 300 mg MD 150<br/>mg q12h (300 mg)<br/>(EMA. Nation)</b> | 98.93       | 96.52      | 89.99    | 75.02    | 47.33    | 18.87    | 3.46      | 0.28      | 0.01      |

|                                                      |       |       |       |       |       |       |      |      |      |
|------------------------------------------------------|-------|-------|-------|-------|-------|-------|------|------|------|
| <b>LD 300 mg MD 180 mg q12h (360 mg) (our study)</b> | 99.22 | 97.21 | 92.44 | 79.6  | 55.2  | 24.87 | 5.96 | 0.58 | 0.01 |
| <b>LD 300 mg MD 120 mg q8h (360 mg) (our study)</b>  | 99.29 | 97.3  | 92.32 | 80.15 | 56.64 | 27    | 7.07 | 0.83 | 0.04 |
| <b>LD 300 mg MD 115 mg q12h (230 mg) (US-FDA)</b>    | 98.25 | 94.38 | 85.47 | 64.52 | 35.11 | 10.51 | 1.63 | 0.09 | 0    |
| <b>LD 300 mg MD 100 mg q12h (200 mg) (our study)</b> | 97.99 | 93.7  | 82.82 | 59.61 | 29.48 | 7.66  | 0.8  | 0.03 | 0    |
| <b>LD 300 mg MD 100 mg q8h (300 mg) (our study)</b>  | 98.99 | 96.72 | 90.4  | 75.88 | 48.87 | 20.57 | 4.56 | 0.49 | 0.02 |

PTA: Probability of target attainment. CrCl: creatinine clearance. MIC: minimum inhibitory concentration. LD: loading dose (in mg of colistin base activity). MD: maintenance dose (in mg of colistin base activity). q12h: every 12 hours. EMA: European Medicines Agency. US-FDA: Food and Drug Administration of United State.

**Table S5.** PTA of different regimens in CrCl range of 80- 100 mL/min.

| <b>MIC (mg/L)<br/>Regimens</b>                          | <b>0.25</b> | <b>0.5</b> | <b>1</b> | <b>2</b> | <b>4</b> | <b>8</b> | <b>16</b> | <b>32</b> | <b>64</b> |
|---------------------------------------------------------|-------------|------------|----------|----------|----------|----------|-----------|-----------|-----------|
| <b>LD 300 mg MD 100 mg q6h (400 mg) (our study)</b>     | 98.26       | 95.12      | 88.16    | 73.69    | 47.16    | 15.12    | 1.17      | 0.01      | 0         |
| <b>LD 300 mg MD 150 mg q8h (450 mg) (our study)</b>     | 98.24       | 94.96      | 87.38    | 72.07    | 47.77    | 21.82    | 5.41      | 0.52      | 0.06      |
| <b>LD 300 mg MD 180 mg q12h (360mg) (Nation)</b>        | 97.49       | 93.37      | 83.54    | 64.36    | 37.17    | 13.54    | 2.48      | 0.18      | 0         |
| <b>LD 300 mg MD 150 mg q12 h (300 mg) (US-FDA. EMA)</b> | 96.88       | 91.32      | 79.36    | 57.85    | 30.55    | 9.38     | 1.37      | 0.06      | 0         |
| <b>LD 300 mg MD 120 mg q6h (480 mg) (our study)</b>     | 98.57       | 96.42      | 90.96    | 79.23    | 55.82    | 23.18    | 2.95      | 0.1       | 0         |
| <b>LD 300 mg MD 100 mg q8h (300 mg) (our study)</b>     | 96.91       | 91.79      | 80.71    | 60.15    | 32.21    | 10.53    | 1.67      | 0.14      | 0         |

PTA: Probability of target attainment. CrCl: creatinine clearance. MIC: minimum inhibitory concentration. LD: loading dose (in mg of colistin base activity). MD: maintenance dose (in mg of colistin base activity). q12h: every 12 hours. EMA: European Medicines Agency. US-FDA: Food and Drug Administration of United State.

**Table S6.** PTA of different regimens in CrCl range of 101- 130 mL/min.

| <b>MIC (mg/L)<br/>Regimens</b>                         | <b>0.25</b> | <b>0.5</b> | <b>1</b> | <b>2</b> | <b>4</b> | <b>8</b> | <b>16</b> | <b>32</b> | <b>64</b> |
|--------------------------------------------------------|-------------|------------|----------|----------|----------|----------|-----------|-----------|-----------|
| <b>LD 300 mg MD 150 mg q12h (300 mg) (EMA. US-FDA)</b> | 93.08       | 83.65      | 66.7     | 43.75    | 19.86    | 5.06     | 0.59      | 0.04      | 0         |

|                                                              |       |       |       |       |       |       |      |      |   |
|--------------------------------------------------------------|-------|-------|-------|-------|-------|-------|------|------|---|
| <b>LD 300 mg MD 180<br/>mg q12h (360 mg)<br/>(Nation)</b>    | 94.55 | 87.1  | 72.02 | 49.99 | 24.42 | 7.14  | 0.89 | 0.02 | 0 |
| <b>LD 300 mg MD 100<br/>mg q6h (400 mg) (our<br/>study)</b>  | 95.88 | 90.93 | 80.25 | 60.55 | 31.35 | 6.82  | 0.31 | 0.02 | 0 |
| <b>LD 300 mg MD 100<br/>mg q4h (600 mg) (our<br/>study)</b>  | 97.65 | 94.6  | 88.26 | 74.72 | 50.7  | 21.45 | 3.03 | 0.13 | 0 |
| <b>LD 300 mg MD 150<br/>mg q6h (600 mg) (our<br/>study)</b>  | 97.83 | 94.62 | 87.51 | 74.6  | 50.27 | 19.63 | 2.1  | 0.07 | 0 |
| <b>LD 300 mg MD 120<br/>mg q6h (480 mg) (our<br/>study)</b>  | 96.93 | 93.02 | 84.19 | 66.91 | 39.46 | 11.63 | 0.83 | 0.01 | 0 |
| <b>LD 300 mg MD 200<br/>mg q12h (400 mg)<br/>(our study)</b> | 95.35 | 88.91 | 76.04 | 55.05 | 28.84 | 9.08  | 1.63 | 0.11 | 0 |

PTA: Probability of target attainment. CrCl: creatinine clearance. MIC: minimum inhibitory concentration. LD: loading dose (in mg of colistin base activity). MD: maintenance dose (in mg of colistin base activity). q12h: every 12 hours. EMA: European Medicines Agency. US-FDA: Food and Drug Administration of United State.
